# Supplementary material
Source: HighWire-hosted journal article supplement (https://bmjopen.bmj.com/content/9/8/e025661)
Supplement: inline-supplementary-material-1 [file inline-supplementary-material-1.pdf]

## Trial registration data set :

|                                               |                                                                                                                                                                                                                                                                                                                                                                                                                                                                                                                                                                                                                                                                                                                   |
|-----------------------------------------------|-------------------------------------------------------------------------------------------------------------------------------------------------------------------------------------------------------------------------------------------------------------------------------------------------------------------------------------------------------------------------------------------------------------------------------------------------------------------------------------------------------------------------------------------------------------------------------------------------------------------------------------------------------------------------------------------------------------------|
| Primary registry and trial identifying number | ClinicalTrials.gov<br>NCT03305978                                                                                                                                                                                                                                                                                                                                                                                                                                                                                                                                                                                                                                                                                 |
| Date of registration in primary registry      | September 26, 2017                                                                                                                                                                                                                                                                                                                                                                                                                                                                                                                                                                                                                                                                                                |
| Secondary identifying numbers                 | 38RC17.132                                                                                                                                                                                                                                                                                                                                                                                                                                                                                                                                                                                                                                                                                                        |
| Source(s) of monetary or material support     | University Hospital, Grenoble                                                                                                                                                                                                                                                                                                                                                                                                                                                                                                                                                                                                                                                                                     |
| Primary sponsor                               | University Hospital, Grenoble                                                                                                                                                                                                                                                                                                                                                                                                                                                                                                                                                                                                                                                                                     |
| Secondary sponsor(s)                          | French Thoracic Imaging Society                                                                                                                                                                                                                                                                                                                                                                                                                                                                                                                                                                                                                                                                                   |
| Contact for public queries                    | Emilie CHIPON, PhD, +33476767313, echipon@chu-grenoble.fr                                                                                                                                                                                                                                                                                                                                                                                                                                                                                                                                                                                                                                                         |
| Contact for scientific queries                | Gilbert FERRETTI, MD PhD, +3376767313, gferretti@chu-grenoble.fr                                                                                                                                                                                                                                                                                                                                                                                                                                                                                                                                                                                                                                                  |
| Public title                                  | Pulmonary Nodule Detection: Comparison of an Ultra Low Dose vs Standard Scan.                                                                                                                                                                                                                                                                                                                                                                                                                                                                                                                                                                                                                                     |
| Scientific title                              | Detection of Pulmonary Nodules: Comparison of Ultra-low-dose Chest CT (Approaching a Two Views Chest X-ray Radiation) and Standard Low Dose CT. A Monocentric, Prospective, Non-randomized, Comparative, Open-label Study With Blind Reading of the Judgment Criteria                                                                                                                                                                                                                                                                                                                                                                                                                                             |
| Country of recruitment                        | France                                                                                                                                                                                                                                                                                                                                                                                                                                                                                                                                                                                                                                                                                                            |
| Health condition(s) or problem(s) studied     | Lung cancer screening, radiation exposure                                                                                                                                                                                                                                                                                                                                                                                                                                                                                                                                                                                                                                                                         |
| Intervention(s)                               | <u>Device: Ultra low dose chest CT</u><br>An additional ultra low dose CT row is performed for every subject besides standard diagnostic low dose chest CT.<br>Other Name: Revolution CT (GE Healthcare) 442507CN0, equipped with ASIR V                                                                                                                                                                                                                                                                                                                                                                                                                                                                          |
|                                               | <u>Device: Low dose chest CT</u><br>standard diagnostic low dose chest CT<br>Other Name: Revolution CT (GE Healthcare)                                                                                                                                                                                                                                                                                                                                                                                                                                                                                                                                                                                            |
| Key inclusion and exclusion criteria          | Ages eligible for study: $\geq 18$ years<br>Sexes eligible for study: both<br>Accepts healthy volunteers: no                                                                                                                                                                                                                                                                                                                                                                                                                                                                                                                                                                                                      |
|                                               | <u>Inclusion criteria :</u><br>Patients referred for non enhanced chest CT for following indications : <ul style="list-style-type: none"> <li>- lung nodule search or control</li> <li>- nodular abnormality on chest X ray</li> <li>- statement of COPD or emphysema</li> <li>- asbestos exposure</li> <li>- nodule localization before radio frequency ablation</li> <li>- assessment of disease extent of an extra thoracic cancer (in case of iodinated intravenous contrast agent contraindication)</li> <li>- statement before extrathoracic transplantation (in case of iodinated intravenous contrast agent contraindication)</li> </ul> Affiliated with the french social security<br>Who signed consent |
|                                               | <u>Exclusion criteria :</u><br>Inability to lie down and stay still during the examination<br>Inability to hold breath more than 5 seconds<br>Pneumonia in the last 3 months<br>Body mass index more than 35kg/m <sup>2</sup><br>exclusion period of another interventionnal study                                                                                                                                                                                                                                                                                                                                                                                                                                |

|                         |                                                                                                                                                                                                                                                                                                                                                                                                                                                                                                                                                                                                                                                                                                                                                                                                                                                                                                                                                                                                                                                                                                                                                                                                                                                                                                                                                                                                                                                                                                                                                                                                                                                                                                                                                                                                                                                                                                                                                                                                                                                                                                                                                                                                      |
|-------------------------|------------------------------------------------------------------------------------------------------------------------------------------------------------------------------------------------------------------------------------------------------------------------------------------------------------------------------------------------------------------------------------------------------------------------------------------------------------------------------------------------------------------------------------------------------------------------------------------------------------------------------------------------------------------------------------------------------------------------------------------------------------------------------------------------------------------------------------------------------------------------------------------------------------------------------------------------------------------------------------------------------------------------------------------------------------------------------------------------------------------------------------------------------------------------------------------------------------------------------------------------------------------------------------------------------------------------------------------------------------------------------------------------------------------------------------------------------------------------------------------------------------------------------------------------------------------------------------------------------------------------------------------------------------------------------------------------------------------------------------------------------------------------------------------------------------------------------------------------------------------------------------------------------------------------------------------------------------------------------------------------------------------------------------------------------------------------------------------------------------------------------------------------------------------------------------------------------|
|                         | referred for articles L1121-5 to L1121-8 of french public health code<br>Pregnant or breastfeeding women                                                                                                                                                                                                                                                                                                                                                                                                                                                                                                                                                                                                                                                                                                                                                                                                                                                                                                                                                                                                                                                                                                                                                                                                                                                                                                                                                                                                                                                                                                                                                                                                                                                                                                                                                                                                                                                                                                                                                                                                                                                                                             |
| Study type              | Interventional                                                                                                                                                                                                                                                                                                                                                                                                                                                                                                                                                                                                                                                                                                                                                                                                                                                                                                                                                                                                                                                                                                                                                                                                                                                                                                                                                                                                                                                                                                                                                                                                                                                                                                                                                                                                                                                                                                                                                                                                                                                                                                                                                                                       |
|                         | <u>Allocation</u> : Non-Randomized                                                                                                                                                                                                                                                                                                                                                                                                                                                                                                                                                                                                                                                                                                                                                                                                                                                                                                                                                                                                                                                                                                                                                                                                                                                                                                                                                                                                                                                                                                                                                                                                                                                                                                                                                                                                                                                                                                                                                                                                                                                                                                                                                                   |
|                         | <u>Intervention Model</u> : Sequential Assignment                                                                                                                                                                                                                                                                                                                                                                                                                                                                                                                                                                                                                                                                                                                                                                                                                                                                                                                                                                                                                                                                                                                                                                                                                                                                                                                                                                                                                                                                                                                                                                                                                                                                                                                                                                                                                                                                                                                                                                                                                                                                                                                                                    |
|                         | <u>Intervention Model Description</u> : Major Patient Addressed for Thoracic CT without Injection of Contrast                                                                                                                                                                                                                                                                                                                                                                                                                                                                                                                                                                                                                                                                                                                                                                                                                                                                                                                                                                                                                                                                                                                                                                                                                                                                                                                                                                                                                                                                                                                                                                                                                                                                                                                                                                                                                                                                                                                                                                                                                                                                                        |
|                         | <u>Masking</u> : Single (Outcomes Assessor)                                                                                                                                                                                                                                                                                                                                                                                                                                                                                                                                                                                                                                                                                                                                                                                                                                                                                                                                                                                                                                                                                                                                                                                                                                                                                                                                                                                                                                                                                                                                                                                                                                                                                                                                                                                                                                                                                                                                                                                                                                                                                                                                                          |
|                         | <u>Masking Description</u> : blinding evaluation of criteria                                                                                                                                                                                                                                                                                                                                                                                                                                                                                                                                                                                                                                                                                                                                                                                                                                                                                                                                                                                                                                                                                                                                                                                                                                                                                                                                                                                                                                                                                                                                                                                                                                                                                                                                                                                                                                                                                                                                                                                                                                                                                                                                         |
|                         | <u>Primary purpose</u> : diagnostic                                                                                                                                                                                                                                                                                                                                                                                                                                                                                                                                                                                                                                                                                                                                                                                                                                                                                                                                                                                                                                                                                                                                                                                                                                                                                                                                                                                                                                                                                                                                                                                                                                                                                                                                                                                                                                                                                                                                                                                                                                                                                                                                                                  |
| Date of first enrolment | October 3, 2017                                                                                                                                                                                                                                                                                                                                                                                                                                                                                                                                                                                                                                                                                                                                                                                                                                                                                                                                                                                                                                                                                                                                                                                                                                                                                                                                                                                                                                                                                                                                                                                                                                                                                                                                                                                                                                                                                                                                                                                                                                                                                                                                                                                      |
| Target sample size      | 150                                                                                                                                                                                                                                                                                                                                                                                                                                                                                                                                                                                                                                                                                                                                                                                                                                                                                                                                                                                                                                                                                                                                                                                                                                                                                                                                                                                                                                                                                                                                                                                                                                                                                                                                                                                                                                                                                                                                                                                                                                                                                                                                                                                                  |
| Recruitment status      | Recruiting                                                                                                                                                                                                                                                                                                                                                                                                                                                                                                                                                                                                                                                                                                                                                                                                                                                                                                                                                                                                                                                                                                                                                                                                                                                                                                                                                                                                                                                                                                                                                                                                                                                                                                                                                                                                                                                                                                                                                                                                                                                                                                                                                                                           |
| Primary outcome(s)      | Ultra low dose CT lung nodule detection sensibility [ Time Frame: 22 months ]<br>Detection rate (%) of $\geq 4$ mm lung nodules in ultra low dose chest CT versus standard low                                                                                                                                                                                                                                                                                                                                                                                                                                                                                                                                                                                                                                                                                                                                                                                                                                                                                                                                                                                                                                                                                                                                                                                                                                                                                                                                                                                                                                                                                                                                                                                                                                                                                                                                                                                                                                                                                                                                                                                                                       |
| Key secondary outcomes  | <ul style="list-style-type: none"> <li>- Ultra low dose CT diagnostic performances of lung nodule detection [ Time Frame: 22 months ] :true positives, false positives, true negatives, false negatives, positive predictive value, negative predictive value, specificity, of <math>\geq 4</math>mm lung nodules detection within ultra low dose chest CT versus standard low dose chest CT</li> <li>- Concordance of <math>\geq 4</math>mm lung nodules characteristics between ultra low dose and standard low dose chest CT [ Time Frame: 22 months ] : comparison of size, density, type (true nodule or intrapulmonary ganglion) of <math>\geq 4</math>mm lung nodule between ultra low dose and standard low dose chest CT</li> <li>- Ultra low dose CT inter-observer reproducibility [ Time Frame: 22 months ] : inter observer reproducibility for size, density and type of <math>\geq 4</math>mm lung nodule detected in ultra low dose CT</li> <li>- Influence of subjects characteristics, nodule location, and nodule size on detection between ultra low dose and standard low dose chest CT [ Time Frame: 22 months ] : analysis of subjects characteristics (age, gender, body mass index), <math>\geq 4</math>mm nodule location, and <math>\geq 4</math> mm nodule size on detection between ultra low dose and standard low dose chest CT</li> <li>- Concordance of emphysema characteristics between ultra low dose and standard low dose chest CT [ Time Frame: 22 months ] : comparison of emphysema detection, type (centrilobular, paraseptal, panlobular, bullous) and distribution between ultra low dose and standard low dose chest CT</li> <li>- Concordance of coronary calcification detection and quantification between ultra low dose and standard low dose chest CT [ Time Frame: 22 months ] : Comparison of Weston scores between ultra low dose and standard low dose chest CT</li> <li>- Concordance of bronchial abnormalities evaluation between ultra low dose and standard low dose chest CT [ Time Frame: 22 months ] : comparison of detection of bronchial thickening or dilatation between ultra low dose and standard low dose chest CT</li> </ul> |
| Ethics Review           | approved by the relevant ethical committee (Comité de Protection des Personnes, CPP Sud-Est VI, France, CPP Reference: AU1342), on July 7, 2017                                                                                                                                                                                                                                                                                                                                                                                                                                                                                                                                                                                                                                                                                                                                                                                                                                                                                                                                                                                                                                                                                                                                                                                                                                                                                                                                                                                                                                                                                                                                                                                                                                                                                                                                                                                                                                                                                                                                                                                                                                                      |
